# Supplementary material for: HPV Types in Cervical Precancer by HIV Status and Birth Region: A Population-Based Register Study
Source: Oxford University Press journal article supplement (doi:10.1158/1055-9965.epi-20-0969), 2020-09-23
Supplement: 10559965epi200969-sup-245958_2_supp_6550488_qg52m2.pdf [file 10559965epi200969-sup-245958_2_supp_6550488_qg52m2.pdf]

**Supplementary Table S1: Country of birth and birth region of women living with or without HIV, diagnosed with CIN2+.**

| Country of birth     | Region of birth                 | Frequency | Percent |
|----------------------|---------------------------------|-----------|---------|
| <b>Angola</b>        | Sub-Saharan Africa              | 3         | 0.60    |
| <b>Botswana</b>      | Sub-Saharan Africa              | 1         | 0.20    |
| <b>Brazil</b>        | Latin America and the Caribbean | 3         | 0.60    |
| <b>Burundi</b>       | Sub-Saharan Africa              | 9         | 1.80    |
| <b>Cameroon</b>      | Sub-Saharan Africa              | 5         | 1.00    |
| <b>Cuba</b>          | Latin America and the Caribbean | 3         | 0.60    |
| <b>D.P.R.Korea</b>   | Asia and Pacific                | 1         | 0.20    |
| <b>D.R.Congo</b>     | Sub-Saharan Africa              | 6         | 1.20    |
| <b>Eritrea</b>       | Sub-Saharan Africa              | 15        | 3.00    |
| <b>Estonia</b>       | Eastern Europe and Central Asia | 3         | 0.60    |
| <b>Ethiopia</b>      | Sub-Saharan Africa              | 33        | 6.60    |
| <b>Finland</b>       | Western Europe except Sweden    | 6         | 1.20    |
| <b>Gambia</b>        | Sub-Saharan Africa              | 3         | 0.60    |
| <b>Germany</b>       | Western Europe except Sweden    | 3         | 0.60    |
| <b>Ghana</b>         | Sub-Saharan Africa              | 3         | 0.60    |
| <b>Guinea-Bissau</b> | Sub-Saharan Africa              | 3         | 0.60    |
| <b>India</b>         | Asia and Pacific                | 6         | 1.20    |
| <b>Kenya</b>         | Sub-Saharan Africa              | 24        | 4.80    |
| <b>Lithuania</b>     | Eastern Europe and Central Asia | 3         | 0.60    |
| <b>Malawi</b>        | Sub-Saharan Africa              | 2         | 0.40    |
| <b>Mali</b>          | Sub-Saharan Africa              | 1         | 0.20    |
| <b>Mocambique</b>    | Sub-Saharan Africa              | 2         | 0.40    |
| <b>Namibia</b>       | Sub-Saharan Africa              | 2         | 0.40    |
| <b>Nigeria</b>       | Sub-Saharan Africa              | 7         | 1.40    |
| <b>Philippines</b>   | Asia and Pacific                | 6         | 1.20    |
| <b>Poland</b>        | Eastern Europe and Central Asia | 3         | 0.60    |
| <b>R.Congo</b>       | Sub-Saharan Africa              | 4         | 0.80    |
| <b>R.Korea</b>       | Asia and Pacific                | 2         | 0.40    |
| <b>Russian F.</b>    | Eastern Europe and Central Asia | 6         | 1.20    |
| <b>Rwanda</b>        | Sub-Saharan Africa              | 4         | 0.80    |
| <b>Senegal</b>       | Sub-Saharan Africa              | 8         | 1.60    |
| <b>Slovenia</b>      | Eastern Europe and Central Asia | 3         | 0.60    |
| <b>Somalia</b>       | Sub-Saharan Africa              | 15        | 3.00    |

|                     |                                 |     |        |
|---------------------|---------------------------------|-----|--------|
| <b>South Africa</b> | Sub-Saharan Africa              | 3   | 0.60   |
| <b>Spain</b>        | Western Europe except Sweden    | 3   | 0.60   |
| <b>Sudan</b>        | Sub-Saharan Africa              | 3   | 0.60   |
| <b>Sweden</b>       | Sweden                          | 162 | 32.40  |
| <b>Thailand</b>     | Asia and Pacific                | 78  | 15.60  |
| <b>U.R.Tanzania</b> | Sub-Saharan Africa              | 6   | 1.20   |
| <b>Uganda</b>       | Sub-Saharan Africa              | 30  | 6.00   |
| <b>Venezuela</b>    | Latin America and the Caribbean | 3   | 0.60   |
| <b>Viet Nam</b>     | Asia and Pacific                | 3   | 0.60   |
| <b>Zambia</b>       | Sub-Saharan Africa              | 6   | 1.20   |
| <b>Zimbabwe</b>     | Sub-Saharan Africa              | 5   | 1.00   |
| <b>Total</b>        |                                 | 500 | 100.00 |

For each woman living with HIV two HIV-negative women, living in the same counties (Stockholm or Gothenburg) sometime between 1983 and 2014, diagnosed with CIN2+, were randomly selected, matched for country of birth. For some women living with HIV only one or no HIV-negative women from the same country of birth could be identified. These women were then matched to HIV-negative women from a neighboring country.
